# Supplementary material for: Green “turn-off” luminescent nanosensor for the sensitive analysis of finerenone in various matrices: application of recent greenness assessment techniques
Source: Royal Society of Chemistry journal article supplement (doi:10.1039/d5ra07857a), 2025-01-01
Supplement: d5ra07857a1.pdf [file d5ra07857a1.pdf]

**Green “turn-off” luminescent nanosensor for the sensitive analysis of Finerenone in various matrices: Application of recent greenness assessment techniques**

**SUPPORTING INFORMATION**

## **Instrumentation**

A Cary Eclipse Fluorescence Spectrophotometer (Agilent Technologies, Germany) was employed to assess the fluorescence intensities. The fluorometer featured a 150-W xenon lamp and a 1-cm quartz cell (Agilent Technologies, Germany) and was linked to a computer operating Cary Eclipse software, ADL Shell Application (Agilent Technologies, Inc.). Temperature investigations were performed using a Jeio Tech (Lab Companion) UCP-02 Ultrasonic Cleaner (Korea), equipped with a temperature controller. The pH of the buffers was calibrated using a Hanna Instruments HI2211 pH meter (Romania). The UV Spectrophotometer T80 UV–Vis 1800 (PG Instruments Ltd., UK) was utilized. The deionized water utilized in this study was obtained from a Hamilton-Aqua-Metric system (USA). The Fourier transform infrared (FT-IR) spectrometer (Agilent Technologies, USA) was utilized to get FT-IR spectra. Transmission electron microscopy (TEM, Quanta FEG 250, Czech Republic), operating at an accelerating voltage of 100 kV, was utilized to analyze the morphology and size of the particles.

## **Chemicals and reagents**

Finerenone (FNR) reference material, demonstrating a purity of 99.89%, was supplied by P&C Labs (Cairo, Egypt). The pharmaceutical formulation of FNR (Finoxlab® 20 mg tablets), manufactured by P&C Labs (Cairo, Egypt), was obtained from a local pharmacy. All chemicals and solvents utilized in the investigation were of analytical grade purity. A 0.04 M Britton-Robinson buffer was formulated by combining 0.04 M phosphoric acid ( $\geq 85\%$ , Adwic Co., Egypt), 0.04 M boric acid (99.9%, El-Nasr Chemical Company, Egypt), and 0.04 M acetic acid (96%, Sigma-Aldrich, Germany) with a suitable quantity of 0.2 M sodium hydroxide ( $\geq 98\%$ , Adwia Co., Egypt). Methanol (HPLC grade), acetonitrile, absolute ethanol, isopropanol,

anhydrous citric acid, reduced glutathione, and sodium bicarbonate were sourced from Sigma-Aldrich (Germany), demonstrating a purity of  $\geq 99\%$ . Human plasma specimens were acquired from the National Medical Institute in Damanshour, Egypt, and stored in frozen conditions until utilized.

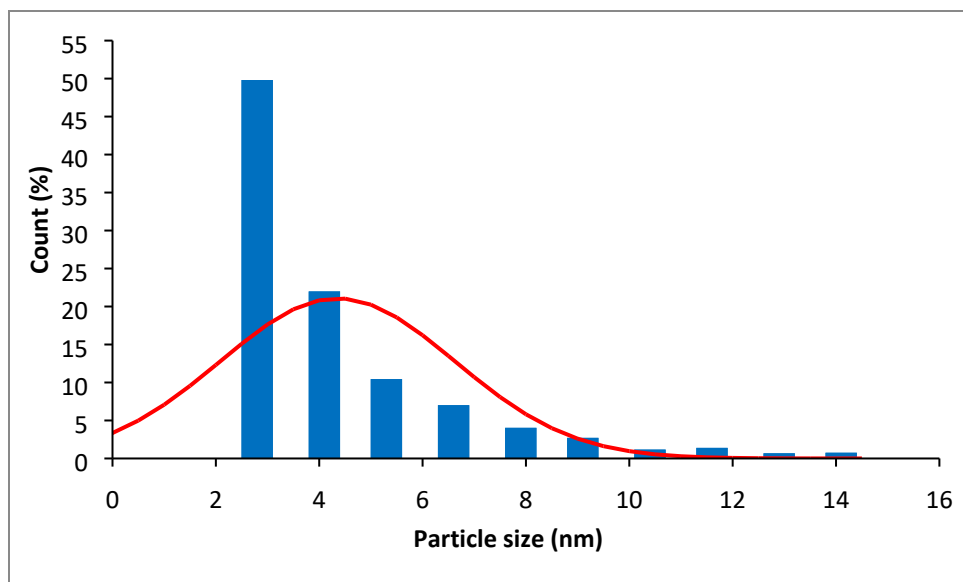

**Fig. S1. Normal particle size distribution of the synthesized N,S-CQDs. The solid red curve represents the fitted normal (Gaussian) distribution.**

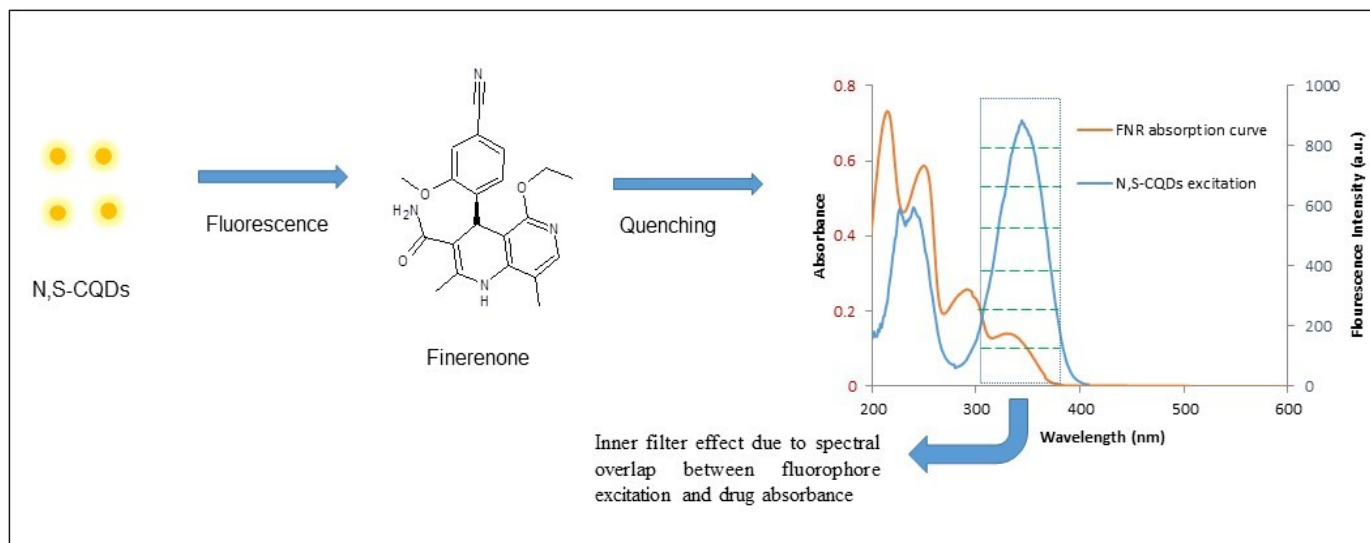

**Fig. S2. Schematic diagram summarizing the sensing mechanism.**

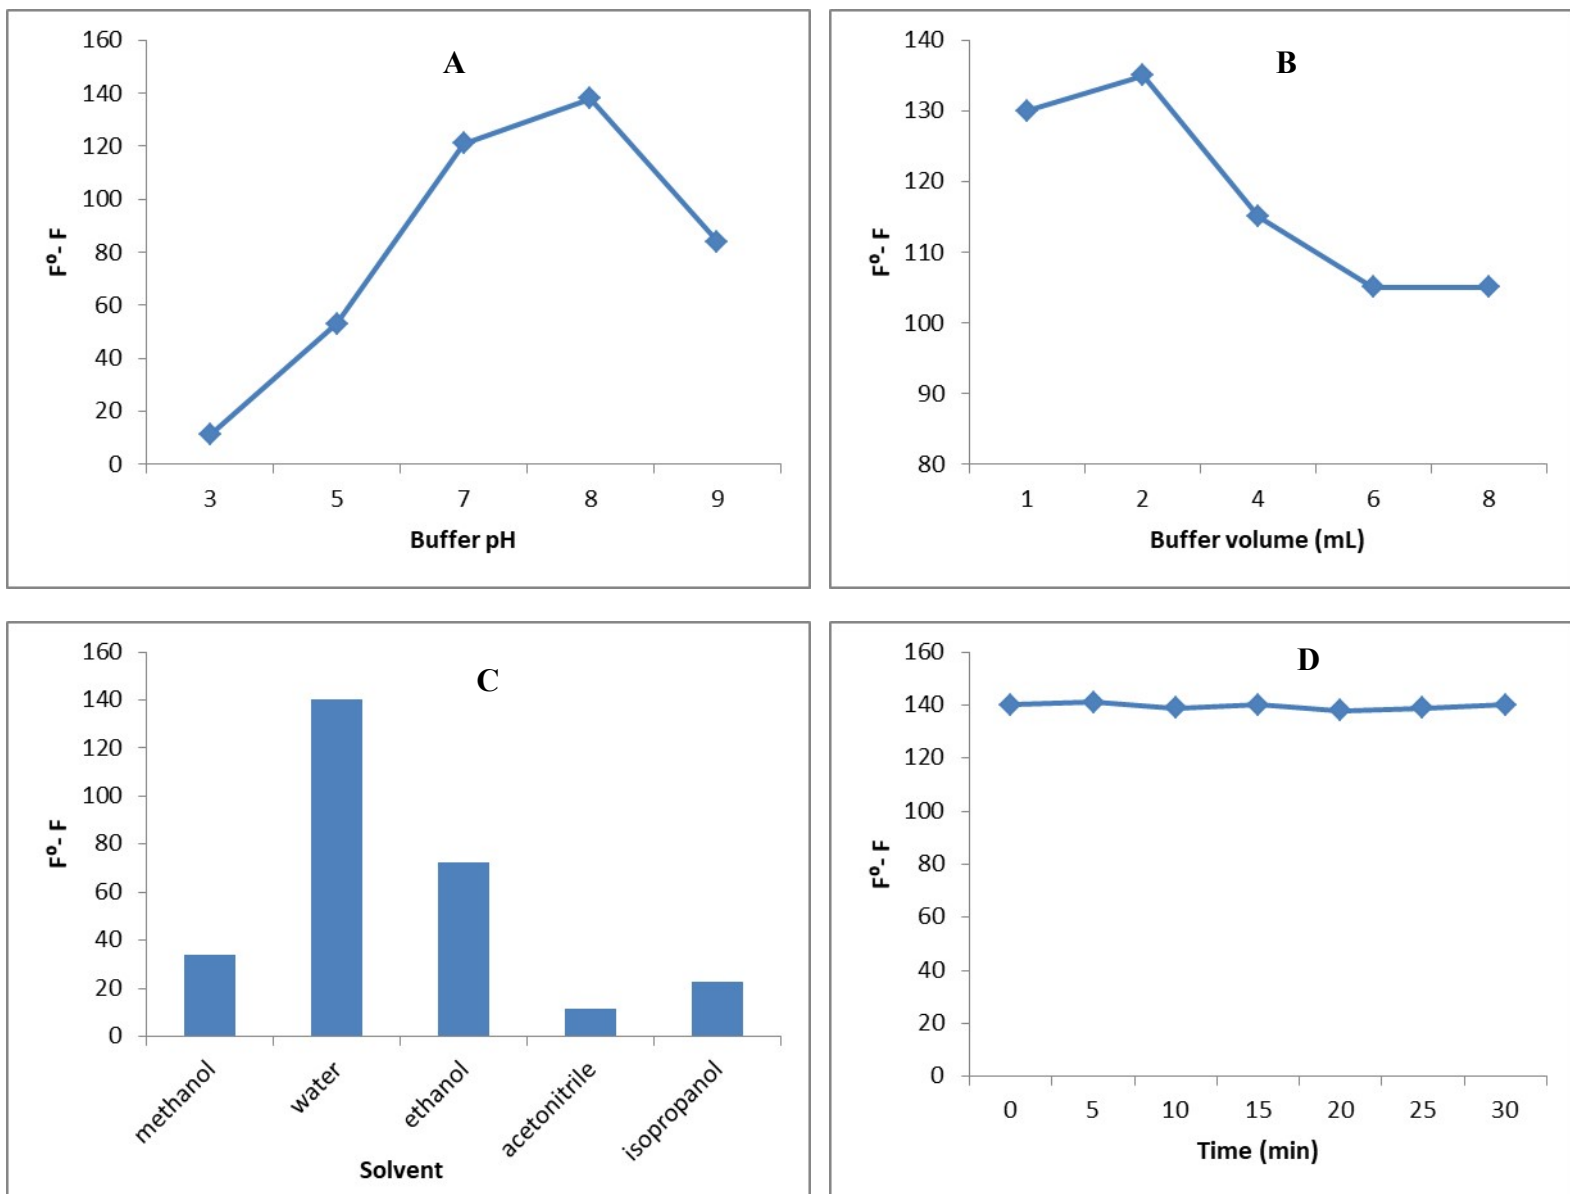

**Fig. S3. Optimization of the analysis conditions for FNR using N,S-CQDs, (A) effect of BR-buffer pH, (B) effect of BR-buffer volume, (C) effect of diluting solvent, and (D) effect of reaction time.**

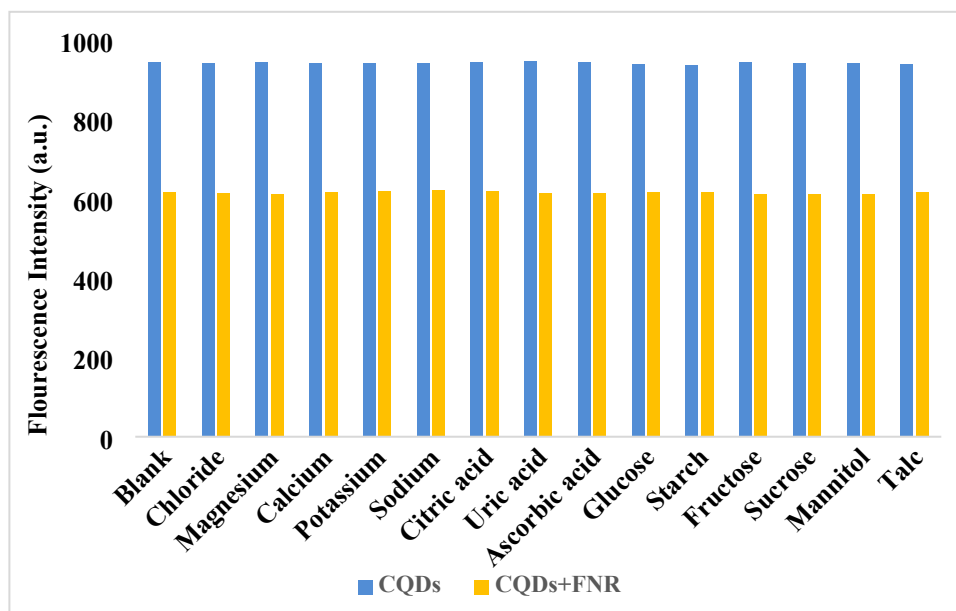

**Fig. S4.** Selectivity of the developed method towards FNR (7  $\mu\text{g/mL}$ ) and the presence of interfering substances (10 times).

**Table S1: Application of the Carbon Footprint Reduction Index (CaFRI) for the evaluation of the suggested spectrofluorimetric methodology.**

| Related Questions                                                                              | Answer                          |
|------------------------------------------------------------------------------------------------|---------------------------------|
| <b>ENERGY</b>                                                                                  | Green zone                      |
| 1 - An energy reduction program or clean energy sources are adopted throughout the procedures: | No                              |
| 2 - Total electrical power use of analytical instruments:                                      | 0.1-1.5 KW                      |
| 3 - Energy-intensive non-analytical equipment is essential:                                    | No                              |
| 4 - Number of samples analyzed per hour:                                                       | >30 samples per hour            |
| <b>CO<sub>2</sub> EMISSION</b>                                                                 | Yellow zone                     |
| 5 - The carbon footprint of the electrical power of analytical instruments is known            | No                              |
| 6 - Emission factor:                                                                           | 0.1-0.3 Kg CO <sub>2</sub> /KWh |
| <b>STORAGE</b>                                                                                 | Green zone                      |
| 7 - Sample Storage:                                                                            | Storage under normal conditions |
| <b>TRANSPORTATION</b>                                                                          | Green zone                      |
| 8 - The sample has to be transported to an analytical Laboratory:                              | Yes                             |
| 9 - Distance between the sample field and the laboratory:                                      | <1 mile                         |
| 10 - Number of samples transported in one shipment:                                            | Not applicable                  |
| 11 - An eco-friendly vehicle is used in transportation:                                        | Yes                             |
| <b>PERSONNEL</b>                                                                               | Green zone                      |
| 12 - Number of personnel required for one sample analysis:                                     | One person                      |
| 13 - Automation:                                                                               | Semiautomatic                   |
| <b>WASTE</b>                                                                                   | Green zone                      |
| 14 - Waste amount:                                                                             | <10g or ml per sample           |
| 15 - Waste disposal:                                                                           | Waste disposable by analyst     |
| <b>RECYCLING</b>                                                                               | Red zone                        |
| 17 - Total number of pictograms:                                                               | <3                              |
| 18 - Total amount of organic solvents per sample:                                              | <5mL                            |

|                                           |        |
|-------------------------------------------|--------|
| 19 - Total amount of reagents per sample: | 1-3 mL |
| <b>Total CaFRI scores</b>                 | 74     |

**Table S2: Comparison of the proposed spectrofluorimetric method with reported approaches in the literature for FNR analysis.**

| Analytical method         | Linearity<br>(concentration range) | LOD           | Application                            | References |
|---------------------------|------------------------------------|---------------|----------------------------------------|------------|
| UV-Spectrophotometry      | 2-14 µg/ml                         | 1.220 µg/ml   | Bulk and commercial dosage form        | 1          |
| UV-Spectrophotometry      | 10-50 µg/ml                        | 2.08 µg/ml    | synthetic mixture                      | 2          |
| Fluorescence spectroscopy | 1–200 ng/mL                        | 0.280 ng/mL   | Bulk powder, tablets, and human plasma | 3          |
| HPLC–MS/MS                | 0.10 - 200 µg/L                    | Not mentioned | Human plasma                           | 4          |
| RP-HPLC                   | 50 to 150 µg/ml)                   | 0.261 µg/ml   | Bulk powder                            | 5          |
| RP-HPLC                   | 1 - 50 µg/mL                       | 0.02 µg/mL    | Bulk powder                            | 6          |

|                              |                      |                |                                                 |            |
|------------------------------|----------------------|----------------|-------------------------------------------------|------------|
| Fluorescence<br>spectroscopy | 0.30 – 9.00<br>μg/ml | 0.098<br>μg/ml | Bulk powder,<br>tablets, and<br>human<br>plasma | This study |
|------------------------------|----------------------|----------------|-------------------------------------------------|------------|

---

## References

1. F. Husnain, P. Mahboob and M. Khaleel, 2023, 16.
2. Badawal Rajnandani , Pooja J. Vyas, Shilpa Rathwa\* , Bhoomika Maletе, Chairesh N Shah and U. Upadhyay, *International Journal of Pharmaceutical Sciences*, 2024, 2, 584-594.
3. S. T. Alsharif, S. I. Alaqel, A. H. Almalki, M. A. Algarni, R. M. Alnemari, M. H. Abduljabbar and A. H. Abdelazim, *Spectrochimica Acta Part A: Molecular and Biomolecular Spectroscopy*, 2024, 309, 123836.
4. G. Rohde, S. Loewen and R. Heinig, *Journal of Chromatography B*, 2021, 1172, 122643.
5. Y. V. Reddy, A. Nayak, G. Sangeetha, M. Deepa and R. Kumta, *Biochemical & Cellular Archives*, 2024, 24.
6. A. Murugesan and M. Mukthinuthalapati, *Acta Sci Pharm Sci*, 2021, 5, 25-31.
